# Supplementary material for: NMR Metabolite Profiling in the Quality and Authentication Assessment of Greek Honey—Exploitation of STOCSY for Markers Identification
Source: MDPI journal article supplement (doi:10.3390/foods11182853), 2022-09-15
Supplement: s1 [file s1]

## Supplementary Materials

Article

# NMR Metabolite Profiling in the Quality and Authentication Assessment of Greek Honey – Exploitation of STOCSY for Markers Identification

Gabriela Belén Lemus Ringele <sup>1</sup>, Stavros Beteinakis <sup>1</sup>, Anastasia Papachristodoulou <sup>1</sup>, Evangelos Axiotis <sup>1,2</sup>, Emmanuel Mikros <sup>3</sup> and Maria Halabalaki <sup>1,\*</sup>

<sup>1</sup> Division of Pharmacognosy and Natural Products Chemistry, Department of Pharmacy, National and Kapodistrian University of Athens, Panepistimiopolis, Zografou, 15771 Athens, Greece

<sup>2</sup> Natural Products Research Center “NatProAegean”, Gera, 81106 Lesvos, Greece

<sup>3</sup> Division of Pharmaceutical Chemistry, Department of Pharmacy, National and Kapodistrian University of Athens, Panepistimiopolis, Zografou, 15771 Athens, Greece

\* Correspondence: mariahal@pharm.uoa.gr

**Table S1.** Metadata of all the honey samples from the Northeast Aegean region of Greece under study.

| Sample Code | Geographical Origin (Region) | Subregion        | Botanical Origin |
|-------------|------------------------------|------------------|------------------|
| HON01       | Agios Efstratios             | Agios Efstratios | Plant            |
| HON02       | Ikaria                       | Gialiskari       | Spring           |
| HON03       | Ikaria                       | Gialiskari       | Spring           |
| HON04       | Ikaria                       | Gialiskari       | Heather          |
| HON05       | Ikaria                       | Gialiskari       | Heather          |
| HON06       | Ikaria                       | Gialiskari       | Thyme            |
| HON07       | Ikaria                       | Gialiskari       | Thyme            |
| HON08       | Lesvos                       | Agiasos          | Chestnut         |
| HON09       | Lesvos                       | Agra             | Blossom          |
| HON10       | Lesvos                       | Airport          | Blossom          |
| HON11       | Lesvos                       | Brisa            | Blossom          |
| HON12       | Lesvos                       | Gera             | Blossom          |
| HON13       | Lesvos                       | Eresos/Sigkri    | Blossom          |
| HON14       | Lesvos                       | Thermis          | Blossom          |
| HON15       | Lesvos                       | Kalloni          | Blossom          |
| HON16       | Lesvos                       | Kapi             | Plant            |
| HON17       | Lesvos                       | Kapi             | Plant            |
| HON18       | Lesvos                       | Loutra/Mytilene  | Blossom          |
| HON19       | Lesvos                       | Mesotopos        | Plant            |
| HON20       | Lesvos                       | Mesotopos        | Plant            |
| HON21       | Lesvos                       | Plagia Plomariou | Plant            |

| Sample Code | Geographical Origin<br>(Region) | Subregion        | Botanical Origin |
|-------------|---------------------------------|------------------|------------------|
| HON22       | Lesvos                          | Plagia Plomariou | Plant            |
| HON23       | Lesvos                          | Plomari          | Blossom          |
| HON24       | Lesvos                          | Plomari          | Plant            |
| HON25       | Lesvos                          | Plomari          | Plant            |
| HON26       | Lesvos                          | Stypsi           | Blossom          |
| HON27       | Lesvos                          | Plagia Plomariou | Plant            |
| HON28       | Lesvos                          | Plagia Plomariou | Plant            |
| HON29       | Lemnos                          | Agia Marina      | Thyme            |
| HON30       | Lemnos                          | Kaspakas         | Thyme            |
| HON31       | Lemnos                          | Manikati         | Thyme            |
| HON32       | Lemnos                          | Chavouli         | Thyme            |
| HON33       | Lemnos                          | Agia Marina      | Thyme            |
| HON34       | Samos                           | Agios Ioannis    | Plant            |
| HON35       | Samos                           | Drakei           | Plant            |
| HON36       | Samos                           | Kallithea        | Plant            |
| HON37       | Samos                           | Kampos           | Plant            |
| HON38       | Samos                           | Koutakaika       | Plant            |
| HON39       | Samos                           | Manolates        | Plant            |
| HON40       | Samos                           | Mytileneoi       | Plant            |
| HON41       | Samos                           | Paradeika        | Plant            |
| HON42       | Samos                           | Paradeika        | Plant            |
| HON43       | Samos                           | Petalouda        | Plant            |
| HON44       | Samos                           | Platanos         | Plant            |
| HON45       | Samos                           | Platanos         | Plant            |
| HON46       | Samos                           | Sakouleika       | Plant            |
| HON47       | Samos                           | Stavrinides      | Plant            |
| HON48       | Samos                           | Stavrinides      | Plant            |
| HON49       | Samos                           | Idroussa         | Plant            |
| HON50       | Samos                           | Charoupies       | Plant            |
| HON51       | F. Korseon                      | Fournoi Korseon  | Thyme            |
| HON52       | F. Korseon                      | Fournoi Korseon  | Thyme            |
| HON53       | F. Korseon                      | Kamari           | Thyme            |
| HON54       | F. Korseon                      | Kamari           | Thyme            |
| HON55       | F. Korseon                      | Bali             | Thyme            |
| HON56       | F. Korseon                      | Kamari           | Thyme            |
| HON57       | F. Korseon                      | Bali             | Thyme            |
| HON58       | F. Korseon                      | Kamari           | Thyme            |
| HON59       | Chios                           | Chios            | Plant            |
| HON60       | Chios                           | Chios            | Plant            |
| HON61       | Chios                           | Aygonyma         | Plant            |
| HON62       | Chios                           | Vessa            | Plant            |
| HON63       | Chios                           | Viki             | Plant            |
| HON64       | Chios                           | Viki             | Plant            |
| HON65       | Chios                           | Egrigyros        | Plant            |

| Sample Code | Geographical Origin (Region) | Subregion   | Botanical Origin |
|-------------|------------------------------|-------------|------------------|
| HON66       | Chios                        | Tholopotami | Plant            |
| HON67       | Chios                        | Kabi        | Plant            |
| HON68       | Chios                        | Kardamyla   | Plant            |
| HON69       | Chios                        | Kardamyla   | Plant            |
| HON70       | Chios                        | Kourounia   | Plant            |
| HON71       | Chios                        | Leptypoda   | Plant            |
| HON72       | Chios                        | Spartounda  | Plant            |
| HON73       | Chios                        | Chalandra   | Plant            |
| HON74       | Psara                        | Psara       | Thyme            |
| HON75       | Psara                        | Psara       | Thyme            |
| HON76       | Psara                        | Psara       | Thyme            |

### High-performance liquid chromatography (HPLC-DAD)

An analytical HPLC (Thermo Finnigan system) consisting of a UV detector Spectra System UV2000LP detector; Diode-Array Detection (DAD) SpectraSystem UV6000LP a P4000 pump, an AS3000 automatic sample injector and a 1000 degasser (all SpectraSystem), was used for qualitative analysis of honey samples. All samples were prepared in a concentration of 10 mg/mL. Chromatograms were obtained using a Supelco RP18 UniverSilHS column (250x4.6mm, 5  $\mu$ m), with a mobile phase consisted of Solvent A (H<sub>2</sub>O+0.1%FA *v/v*) and Solvent B (Acetonitrile, ACN). Injection volume was set at 20  $\mu$ L, and the analysis was conducted at room temperature. The gradient elution method used is described in the table below. Data acquisition was performed using ChromQuest<sup>TM</sup> Software 4.1.

| Time (min) | Solvent A (H <sub>2</sub> O+0.1%FA) | Solvent B (ACN) | Flow (mL/min) |
|------------|-------------------------------------|-----------------|---------------|
| 0          | 85                                  | 15              | 1             |
| 15         | 70                                  | 30              | 1             |
| 30         | 60                                  | 40              | 1             |
| 35         | 60                                  | 40              | 1             |
| 40         | 50                                  | 50              | 1             |
| 45         | 50                                  | 50              | 1             |
| 55         | 10                                  | 90              | 1             |
| 70         | 10                                  | 90              | 1             |
| 73         | 85                                  | 15              | 1             |
| 75         | 85                                  | 15              | 1             |

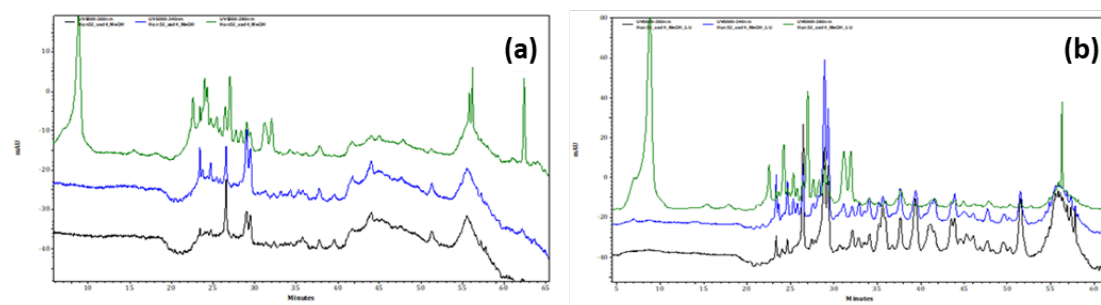

**Figure S1.** HPLC chromatograms of a Thyme honey using Amberlite XAD-4 adsorbent resin: (a) Before LLE and (b) after LLE at 290 nm (green), 340 nm (blue) and 360 nm (black).

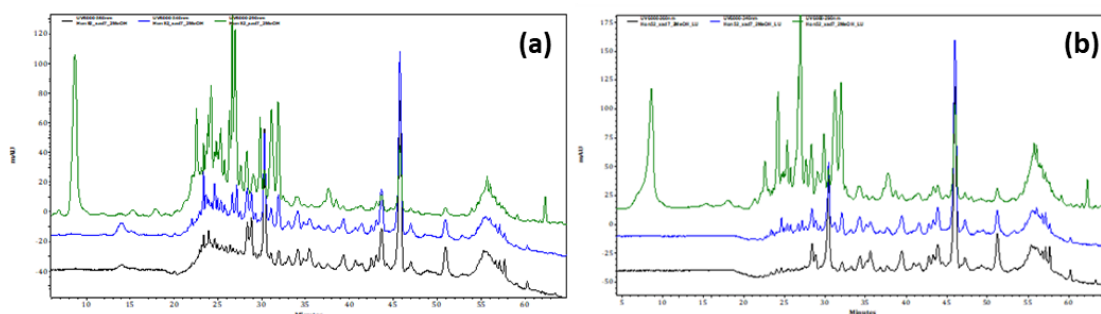

**Figure S2.** HPLC chromatograms of a Thyme honey using Amberlite XAD-7 adsorbent resin: (a) Before LLE and (b) after LLE at 290 nm (green), 340 nm (blue) and 360 nm (black).

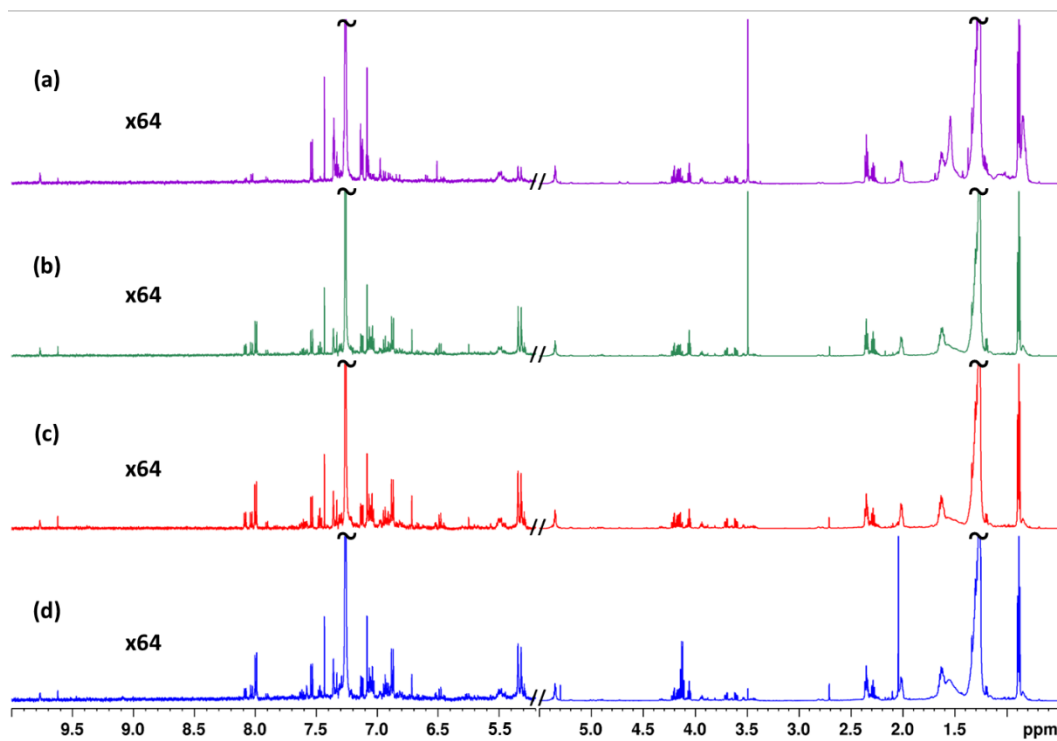

**Figure S3.** Representative  $^1\text{H}$  NMR 600 MHz spectra obtained when using as biphasic system: (a) DCM/MeOH 90:10 *v/v*, (b) EtOAc/DCM 80:20 *v/v*, (c) EtOAc/DCM 90:10 *v/v* and (d) EtOAc 100%. Spectral intensity for the region between 10-5.7 ppm is 64-fold higher than the region between 5.5-0.5 ppm.

**Table S2.** List of models based on botanical origin. A, number of components; N, number of observations; cumulative  $R^2X$ ,  $R^2Y$ ,  $Q^2$  values, F statistic and p-values determined from CV-ANOVA.

| Model                   | A     | N   | $R^2X$ | $R^2Y$ | $Q^2$ | F    | p-value |
|-------------------------|-------|-----|--------|--------|-------|------|---------|
| PCA                     | 10    | 142 | 0.795  |        | 0.735 |      |         |
| PLS-DA                  | 7     | 142 | 0.736  | 0.841  | 0.645 | 25.7 | < 0.05  |
| OPLS-DA (Plant/thyme)   | 1+5+0 | 122 | 0.725  | 0.949  | 0.907 | 67.2 | < 0.05  |
| OPLS-DA (Plant/Blossom) | 1+4+0 | 106 | 0.615  | 0.788  | 0.471 | 5.73 | < 0.05  |
| OPLS-DA (Thyme/Blossom) | 1+4+0 | 56  | 0.718  | 0.987  | 0.915 | 42.4 | < 0.05  |

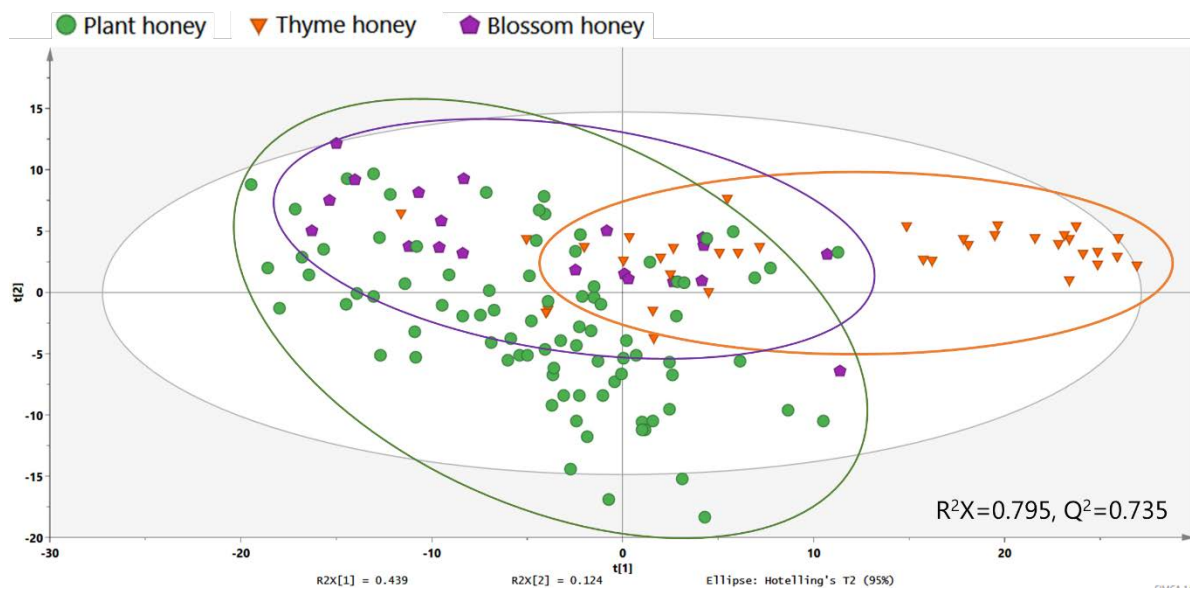

**Figure S4.** PCA scores scatter plot of the dataset showing the clustering based on botanical origin. Heather, chestnut and spring honeys were excluded due to their limited sample size.

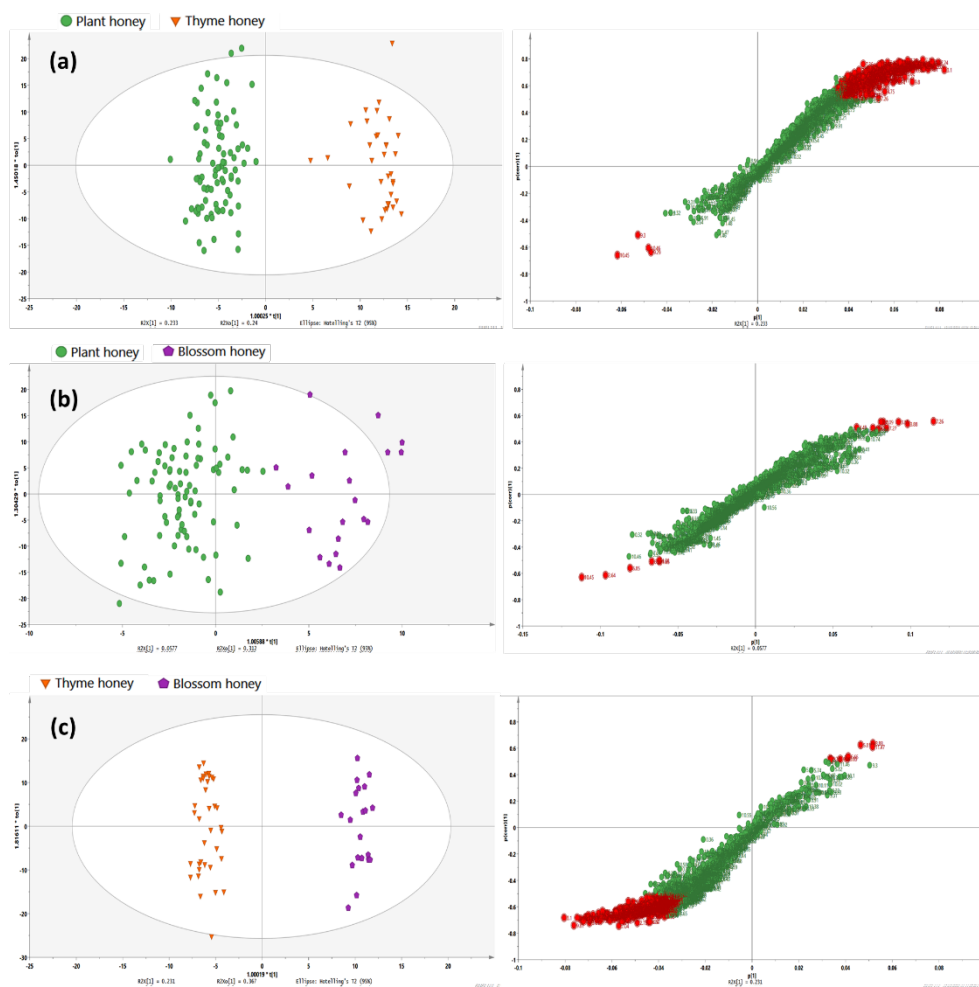

**Figure S5.** OPLS-DA scores scatter plots based on botanical origin with their respective S-plots. (a) Plant vs. Thyme, (b) Plant vs. Blossom, (c) Thyme vs. Blossom.

**Table S3.** List of models based on geographical origin. A, number of components; N, number of observations; cumulative  $R^2X$ ,  $R^2Y$ ,  $Q^2$  values, F statistic and p-values determined from CV-ANOVA.

| Model                    | A     | N   | $R^2X$ | $R^2Y$ | $Q^2$ | F     | p-value |
|--------------------------|-------|-----|--------|--------|-------|-------|---------|
| PCA                      | 13    | 138 | 0.820  |        | 0.741 |       |         |
| PLS-DA                   | 11    | 138 | 0.789  | 0.902  | 0.807 | 19.4  | < 0.05  |
| OPLS-DA (Ikaria/Lesvos)  | 1+4+0 | 54  | 0.719  | 0.975  | 0.916 | 39.4  | < 0.05  |
| OPLS-DA (Ikaria/Lemnos)  | 1+3+0 | 22  | 0.817  | 0.994  | 0.970 | 46.8  | < 0.05  |
| OPLS-DA (Ikaria/Samos)   | 1+3+0 | 46  | 0.711  | 0.979  | 0.933 | 57.6  | < 0.05  |
| OPLS-DA (Ikaria/Fournoi) | 1+2+0 | 28  | 0.814  | 0.984  | 0.964 | 85.4  | < 0.05  |
| OPLS-DA (Ikaria/Chios)   | 1+3+0 | 42  | 0.743  | 0.974  | 0.934 | 51.6  | < 0.05  |
| OPLS-DA (Lesvos/Lemnos)  | 1+4+0 | 52  | 0.621  | 0.986  | 0.918 | 38.1  | < 0.05  |
| OPLS-DA (Lesvos/Samos)   | 1+1+0 | 75  | 0.494  | 0.932  | 0.919 | 198.2 | < 0.05  |
| OPLS-DA (Lesvos/Fournoi) | 1+2+0 | 58  | 0.672  | 0.979  | 0.956 | 181.9 | < 0.05  |
| OPLS-DA (Lesvos/Chios)   | 1+2+0 | 72  | 0.558  | 0.913  | 0.873 | 71.70 | < 0.05  |
| OPLS-DA (Lemnos/Samos)   | 1+1+0 | 43  | 0.479  | 0.967  | 0.954 | 194.1 | < 0.05  |
| OPLS-DA (Lemnos/Fournoi) | 1+2+0 | 26  | 0.777  | 0.992  | 0.972 | 94.8  | < 0.05  |
| OPLS-DA (Lemnos/Chios)   | 1+3+0 | 40  | 0.556  | 0.993  | 0.959 | 79.3  | < 0.05  |

|                         |       |    |       |       |       |       |        |
|-------------------------|-------|----|-------|-------|-------|-------|--------|
| OPLS-DA (Samos/Fournoi) | 1+2+0 | 49 | 0.744 | 0.992 | 0.982 | 331.7 | < 0.05 |
| OPLS-DA (Samos/Chios)   | 1+3+0 | 64 | 0.589 | 0.967 | 0.924 | 69.7  | < 0.05 |
| OPLS-DA (Fournoi/Chios) | 1+2+0 | 46 | 0.729 | 0.977 | 0.961 | 133.7 | < 0.05 |

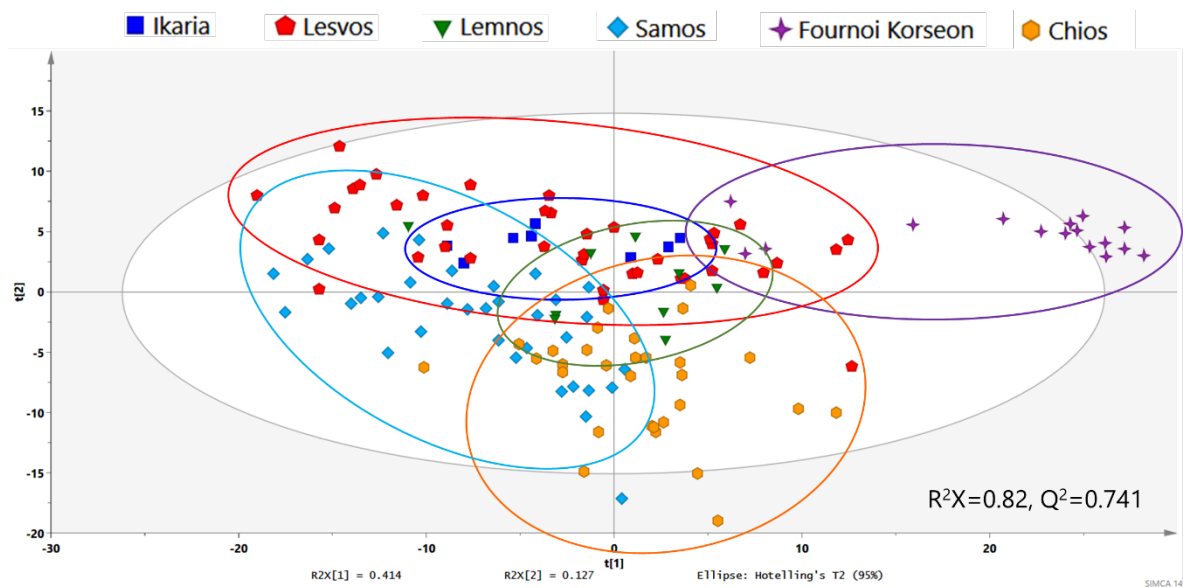

**Figure S6.** PCA scores scatter plot of the dataset showing the clustering based on geographical origin. Psara and Agios Efstratios honeys were excluded due to their limited sample size.

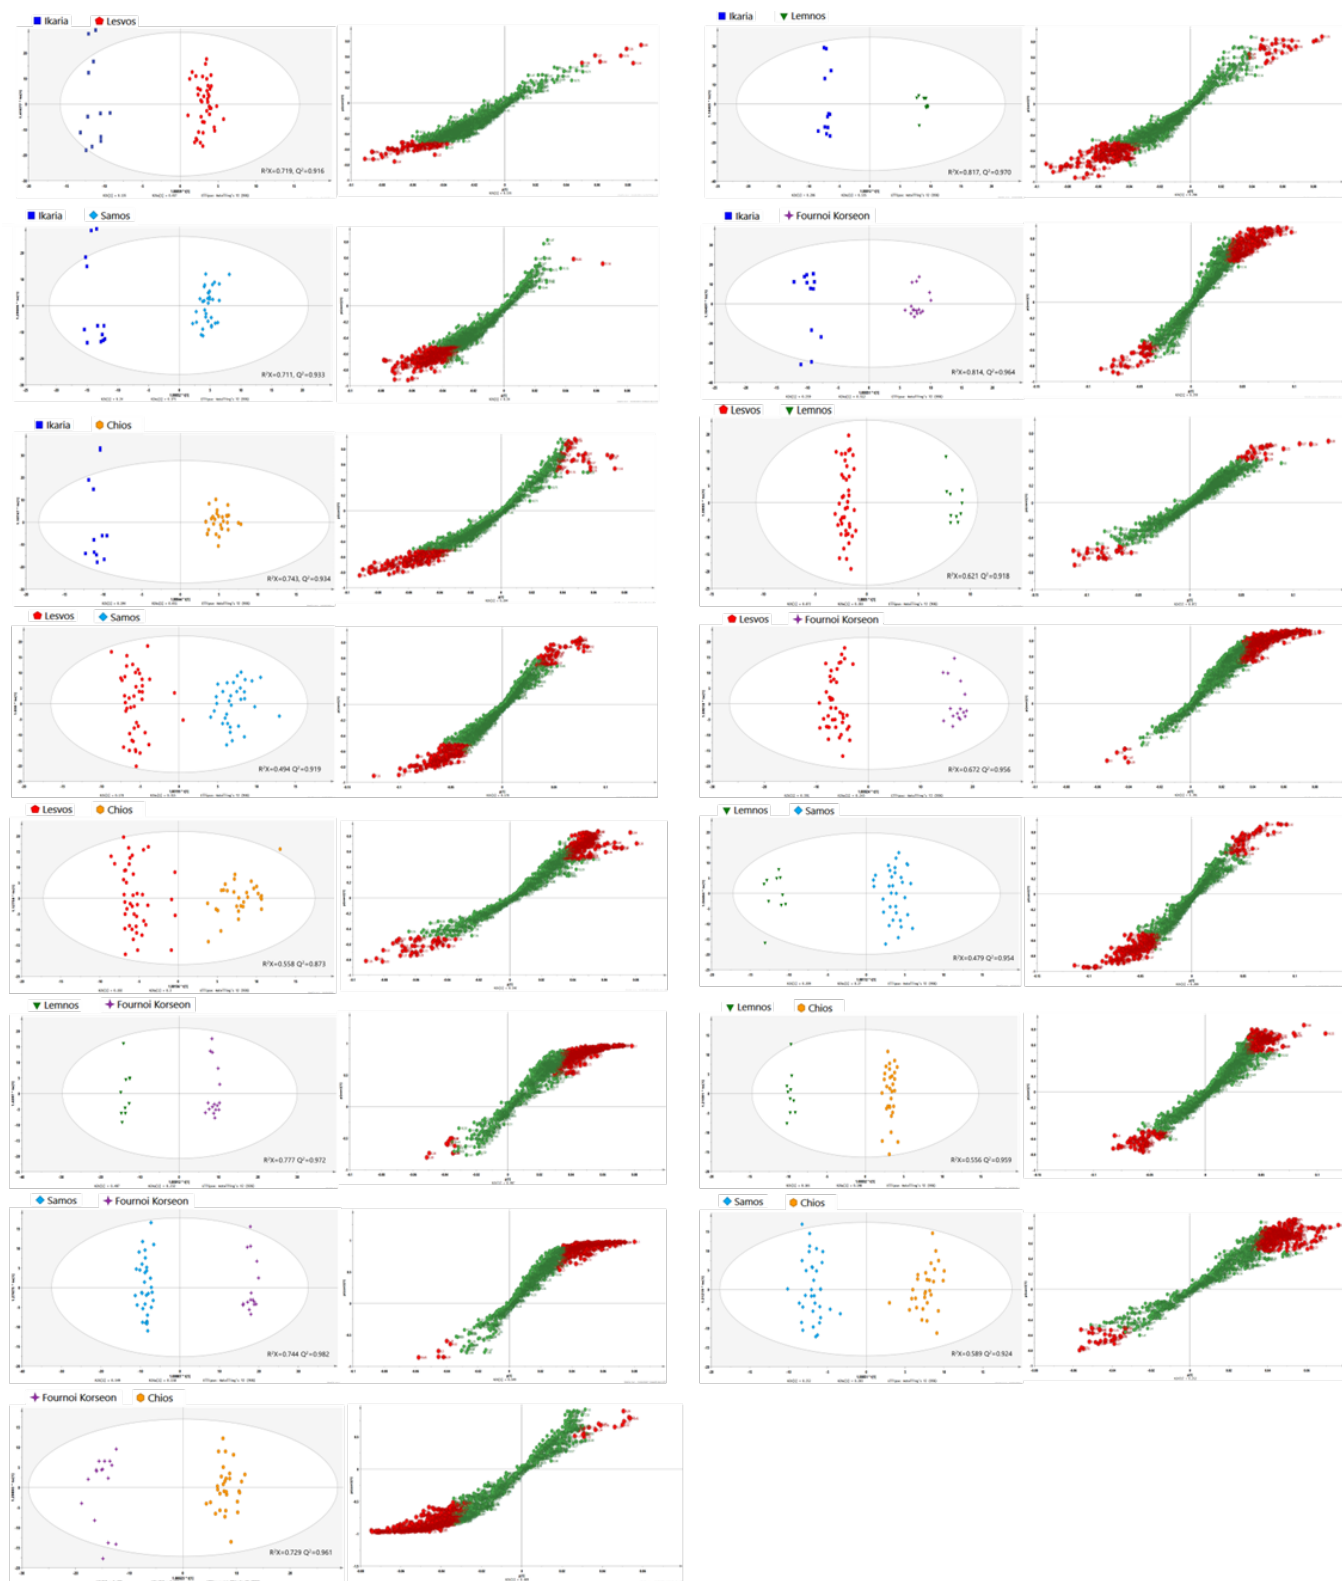

Figure S7. OPLS-DA scores scatter plots based on geographical origin with their respective S-plots.

## Ultra-high performance liquid chromatography coupled to a hybrid resolution Mass spectrometer (UHPLC-HRMS & MS/MS)

Quality control of honey samples was carried out using a Velos Pro Ion Trap-Orbitrap Elite Hybrid Mass Spectrometer system (Thermo Scientific; Bremen, Germany), with a heated electrospray ion source (HESI) hyphenated to a Waters Acquity UPLC (Waters Corporation, Milford, MA, USA) system. The chromatographic column used was a Waters Acquity UPLC C18 (2.1x150m, 1.7um) adjusted at 40°C. The total running time of the method was 30 min, and the injection volume was 10 uL. All samples were prepared at a concentration of 500 ug/mL. The elution method is described in the table below.

| Time (min) | Solvent A (H <sub>2</sub> O+0.1%FA) | Solvent B (ACN) | Flow (mL/min) |
|------------|-------------------------------------|-----------------|---------------|
| 0          | 95                                  | 5               | 0.3           |
| 1          | 95                                  | 5               | 0.3           |
| 3          | 80                                  | 20              | 0.3           |
| 20         | 40                                  | 60              | 0.3           |
| 23         | 0                                   | 100             | 0.3           |
| 27         | 0                                   | 100             | 0.3           |
| 28         | 95                                  | 5               | 0.3           |
| 30         | 95                                  | 5               | 0.3           |

Data were obtained in negative and positive ionization mode, at a scan range of  $m/z$  113-1000. HESI temperature, capillary interface and source heater temperature was set at 350 °C, while source electrospray voltage was 3.5 kV, S-lens RF level 45% and 60% for negative and positive polarity, respectively. Nitrogen was used as sheath and auxiliary gas with flows set at 45 and 15 arbitrary units, respectively. A data-depended acquisition (DDA) method was set up involving two scan events: a full MS scan followed by HRMS/MS acquisition. Full-scan spectra were acquired at high resolution of 60,000 full width half maximum (FWHM) whereas HRMS/MS acquisition were acquired in mass resolution 17,500 FWHM with normalized collision energy (NCE) of 35%. The entire system control and data processing were performed with Xcalibur 2.2 (Thermo Electron, San Jose, CA, USA) software.

**Table S4.** Identified compounds using HRMS and HRMS/MS in negative ionization mode.

| Compounds                           | Molecular Formula                              | Experimental [M-H] <sup>-</sup> | Theoretical $m/z$ | $\Delta m$ (ppm) | RDBeq | MSMS Fragments (Relative intensity %) |
|-------------------------------------|------------------------------------------------|---------------------------------|-------------------|------------------|-------|---------------------------------------|
| 4-MBZA                              | C <sub>8</sub> H <sub>8</sub> O <sub>3</sub>   | 151.0399                        | 151.0401          | -0.794           | 5.5   | n.d                                   |
| Unedone                             | C <sub>13</sub> H <sub>20</sub> O <sub>4</sub> | 239.1287                        | 239.1287          | -0.794           | 4.5   | n.d                                   |
| Dehydrovomifoliol                   | C <sub>13</sub> H <sub>18</sub> O <sub>3</sub> | -                               | -                 | -                | -     | -                                     |
| BZA                                 | C <sub>7</sub> H <sub>6</sub> O <sub>2</sub>   | 121.0294                        | 121.0295          | -0.756           | 5.5   | n.d                                   |
| ABA                                 | C <sub>15</sub> H <sub>20</sub> O <sub>4</sub> | 263.1289                        | 263.1289          | 0.091            | 6.5   | 219 (100), 201 (37), 152 (12).        |
| 1-(4-methoxyphenyl)-ethane-1,2-diol | C <sub>9</sub> H <sub>12</sub> O <sub>3</sub>  | 167.0713                        | 167.0714          | -0.287           | 4.5   | n.d                                   |
| MSYR                                | C <sub>10</sub> H <sub>12</sub> O <sub>5</sub> | 163.0763                        | 163.0765          | -0.694           | 5.5   | n.d                                   |
| 3-hydroxy-4-phenyl-2- butanone      | C <sub>10</sub> H <sub>12</sub> O <sub>2</sub> | 163.0764                        | 163.0765          | -0.039           | 5.5   | n.d                                   |
| 5-HMF                               | C <sub>6</sub> H <sub>6</sub> O <sub>3</sub>   | 125.0244                        | 125.0244          | -0.270           | 4.5   | n.d                                   |

**Table S5.** Identified compounds using HRMS and HRMS/MS in positive ionization mode.

| Compounds                           | Molecular Formula                              | Experimental                  | Theoretical | $\Delta m$ (ppm) | RDBeq | MSMS Fragments<br>(Relative intensity %) |
|-------------------------------------|------------------------------------------------|-------------------------------|-------------|------------------|-------|------------------------------------------|
|                                     |                                                | [M-H] <sup>-</sup> <i>m/z</i> | <i>m/z</i>  |                  |       |                                          |
| 4-MBZA                              | C <sub>8</sub> H <sub>8</sub> O <sub>3</sub>   | 153.0547                      | 153.0546    | 0.337            | 4.5   | 135 (100)                                |
| Unedone                             | C <sub>13</sub> H <sub>20</sub> O <sub>4</sub> | 241.1432                      | 241.1434    | 0.772            | 3.5   | 197 (100), 223 (80), 205 (42)            |
| Dehydrovomifoliol                   | C <sub>13</sub> H <sub>18</sub> O <sub>3</sub> | 223.1329                      | 223.1329    | 0.012            | 4.5   | 205 (100), 165 (99), 187 (42)            |
| BZA                                 | C <sub>7</sub> H <sub>6</sub> O <sub>2</sub>   | 123.0441                      | 123.0441    | 0.032            | 4.5   | n.d                                      |
| ABA                                 | C <sub>15</sub> H <sub>20</sub> O <sub>4</sub> | 265.1433                      | 265.1434    | 0.357            | 5.5   | 209 (100), 247 (73), 229 (33)            |
| 1-(4-methoxyphenyl)-ethane-1,2-diol | C <sub>9</sub> H <sub>12</sub> O <sub>3</sub>  | -                             | -           | -                | -     | -                                        |
| MSYR                                | C <sub>10</sub> H <sub>12</sub> O <sub>5</sub> | 213.0755                      | 213.0757    | 1.386            | 4.5   | 181 (100)                                |
| 3-hydroxy-4-phenyl-2-butanone       | C <sub>10</sub> H <sub>12</sub> O <sub>2</sub> | 165.0911                      | 165.0910    | 0.445            | 4.5   | 137 (100)                                |
| 5-HMF                               | C <sub>6</sub> H <sub>6</sub> O <sub>3</sub>   | 127.0391                      | 127.0390    | 0.904            | 3.5   | n.d                                      |

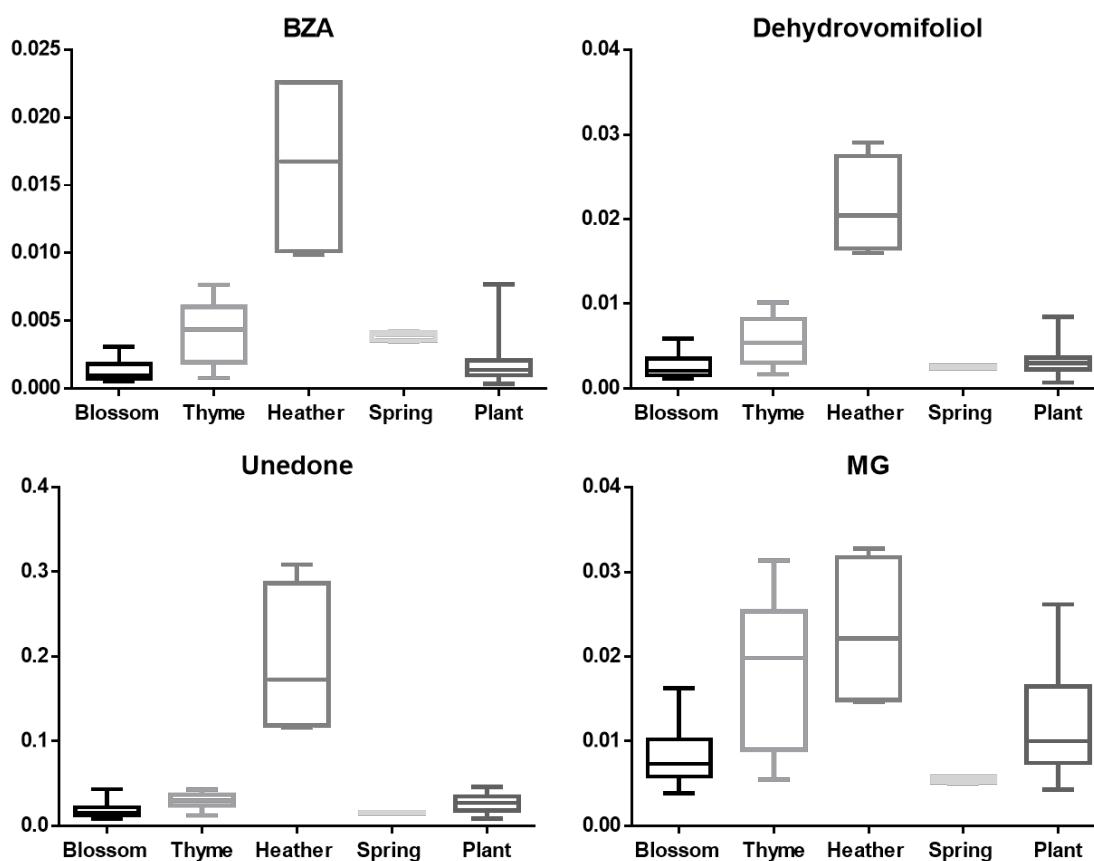

**Figure S8.** Box plots of statistically significant biomarkers based on their botanical origin are presented. All p values can be found in Table S6.

**Table S6.** Box Plot's p values comparing all the possible groups based on Botanical origin. Statistically significant, p value  $\leq$  0.05.

| Groups - Botanical Origin            | Significant | Adjusted P Value |
|--------------------------------------|-------------|------------------|
| <b>5-HMF</b>                         |             |                  |
| Blossom vs. Thyme                    | Yes         | 0.0029           |
| Blossom vs. Heather                  | No          | 0.6079           |
| Blossom vs. Spring                   | Yes         | 0.0233           |
| Blossom vs. Plant                    | Yes         | 0.0078           |
| Thyme vs. Heather                    | Yes         | 0.0068           |
| Thyme vs. Spring                     | Yes         | <0.0001          |
| Thyme vs. Plant                      | Yes         | <0.0001          |
| Heather vs. Spring                   | No          | 0.7259           |
| Heather vs. Plant                    | No          | >0.9999          |
| Spring vs. Plant                     | No          | 0.4959           |
| <b>MSYR</b>                          |             |                  |
| Blossom vs. Thyme                    | Yes         | 0.0002           |
| Blossom vs. Heather                  | No          | 0.1330           |
| Blossom vs. Spring                   | Yes         | 0.0452           |
| Blossom vs. Plant                    | Yes         | 0.0007           |
| Thyme vs. Heather                    | No          | >0.9999          |
| Thyme vs. Spring                     | No          | 0.9770           |
| Thyme vs. Plant                      | No          | 0.8201           |
| Heather vs. Spring                   | No          | 0.9970           |
| Heather vs. Plant                    | No          | 0.9822           |
| Spring vs. Plant                     | No          | 0.8459           |
| <b>MG Derivative</b>                 |             |                  |
| Blossom vs. Thyme                    | Yes         | <0.0001          |
| Blossom vs. Heather                  | Yes         | 0.005            |
| Blossom vs. Spring                   | No          | 0.9156           |
| Blossom vs. Plant                    | No          | 0.1631           |
| Thyme vs. Heather                    | No          | 0.6824           |
| Thyme vs. Spring                     | Yes         | 0.0013           |
| Thyme vs. Plant                      | Yes         | <0.0001          |
| Heather vs. Spring                   | Yes         | 0.0014           |
| Heather vs. Plant                    | Yes         | 0.0081           |
| Spring vs. Plant                     | No          | 0.2691           |
| <b>3-hydroxy-4-phenyl-2-butanone</b> |             |                  |
| Blossom vs. Thyme                    | Yes         | <0.0001          |
| Blossom vs. Heather                  | No          | 0.7343           |
| Blossom vs. Spring                   | No          | >0.9999          |
| Blossom vs. Plant                    | No          | >0.9999          |
| Thyme vs. Heather                    | No          | 0.1235           |
| Thyme vs. Spring                     | Yes         | 0.0022           |
| Thyme vs. Plant                      | Yes         | <0.0001          |
| Heather vs. Spring                   | No          | 0.8411           |
| Heather vs. Plant                    | No          | 0.6709           |

| Groups - Botanical Origin | Significant | Adjusted P Value |
|---------------------------|-------------|------------------|
| Spring vs. Plant          | No          | >0.999           |
| <b>Unedone</b>            |             |                  |
| Blossom vs. Thyme         | No          | 0.1307           |
| Blossom vs. Heather       | Yes         | <0.0001          |
| Blossom vs. Spring        | No          | 0.9872           |
| Blossom vs. Plant         | No          | 0.2812           |
| Thyme vs. Heather         | Yes         | <0.0001          |
| Thyme vs. Spring          | No          | 0.3940           |
| Thyme vs. Plant           | No          | 0.9149           |
| Heather vs. Spring        | Yes         | <0.0001          |
| Heather vs. Plant         | Yes         | <0.0001          |
| Spring vs. Plant          | No          | 0.5655           |
| <b>ABA</b>                |             |                  |
| Blossom vs. Thyme         | No          | 0.9992           |
| Blossom vs. Heather       | Yes         | <0.0001          |
| Blossom vs. Spring        | No          | 0.9757           |
| Blossom vs. Plant         | No          | 0.9582           |
| Thyme vs. Heather         | Yes         | <0.0001          |
| Thyme vs. Spring          | No          | 0.9883           |
| Thyme vs. Plant           | No          | 0.9853           |
| Heather vs. Spring        | Yes         | <0.0001          |
| Heather vs. Plant         | Yes         | <0.0001          |
| Spring vs. Plant          | No          | 0.9982           |
| <b>Dehydrovomifoliol</b>  |             |                  |
| Blossom vs. Thyme         | Yes         | <0.0001          |
| Blossom vs. Heather       | Yes         | <0.0001          |
| Blossom vs. Spring        | No          | >0.9999          |
| Blossom vs. Plant         | No          | 0.8480           |
| Thyme vs. Heather         | Yes         | <0.0001          |
| Thyme vs. Spring          | No          | 0.0297           |
| Thyme vs. Plant           | Yes         | <0.0001          |
| Heather vs. Spring        | Yes         | <0.0001          |
| Heather vs. Plant         | Yes         | <0.0001          |
| Spring vs. Plant          | No          | 0.9769           |
| <b>4-MBA</b>              |             |                  |
| Blossom vs. Thyme         | No          | 0.9047           |
| Blossom vs. Heather       | Yes         | <0.0001          |
| Blossom vs. Spring        | No          | >0.9999          |
| Blossom vs. Plant         | No          | 0.9984           |
| Thyme vs. Heather         | Yes         | <0.0001          |
| Thyme vs. Spring          | No          | 0.9975           |
| Thyme vs. Plant           | No          | 0.9074           |
| Heather vs. Spring        | Yes         | <0.0001          |
| Heather vs. Plant         | Yes         | <0.0001          |
| Spring vs. Plant          | No          | >0.9999          |

| Groups - Botanical Origin                  | Significant | Adjusted P Value |
|--------------------------------------------|-------------|------------------|
| <b>BZA</b>                                 |             |                  |
| Blossom vs. Thyme                          | Yes         | <0.0001          |
| Blossom vs. Heather                        | Yes         | <0.0001          |
| Blossom vs. Spring                         | No          | 0.0680           |
| Blossom vs. Plant                          | No          | 0.9067           |
| Thyme vs. Heather                          | Yes         | <0.0001          |
| Thyme vs. Spring                           | No          | >0.9999          |
| Thyme vs. Plant                            | Yes         | <0.0001          |
| Heather vs. Spring                         | Yes         | <0.0001          |
| Heather vs. Plant                          | Yes         | <0.0001          |
| Spring vs. Plant                           | No          | 0.1193           |
| <b>1-(4-methoxyphenyl)-ethane-1,2-diol</b> |             |                  |
| Blossom vs. Thyme                          | No          | 0.1772           |
| Blossom vs. Heather                        | Yes         | <0.0001          |
| Blossom vs. Spring                         | No          | 0.9972           |
| Blossom vs. Plant                          | No          | 0.9653           |
| Thyme vs. Heather                          | Yes         | <0.0001          |
| Thyme vs. Spring                           | No          | 0.9224           |
| Thyme vs. Plant                            | No          | 0.1501           |
| Heather vs. Spring                         | Yes         | <0.0001          |
| Heather vs. Plant                          | Yes         | <0.0001          |
| Spring vs. Plant                           | No          | >0.9999          |

**Table S7.** Box Plot's p values comparing thyme honey samples with different geographical origin. Statistically significant, p value  $\leq 0.05$ .

| Groups (Geographical Origin) | Significant | Adjusted p Value |
|------------------------------|-------------|------------------|
| <b>5-HMF</b>                 |             |                  |
| Ikaria vs. Lemnos            | Yes         | 0.0069           |
| Ikaria vs. Fournoi           | Yes         | 0.0164           |
| Ikaria vs. Psara             | No          | 0.1602           |
| Lemnos vs. Fournoi           | No          | 0.8719           |
| Lemnos vs. Psara             | No          | 0.5393           |
| Fournoi vs. Psara            | No          | 0.8465           |
| <b>MSYR</b>                  |             |                  |
| Ikaria vs. Lemnos            | No          | 0.7381           |
| Ikaria vs. Fournoi           | Yes         | 0.0468           |
| Ikaria vs. Psara             | Yes         | < 0.0001         |
| Lemnos vs. Fournoi           | No          | 0.1195           |
| Lemnos vs. Psara             | Yes         | < 0.0001         |
| Fournoi vs. Psara            | Yes         | 0.0013           |
| <b>MG Derivative</b>         |             |                  |
| Ikaria vs. Lemnos            | No          | 0.4990           |
| Ikaria vs. Fournoi           | Yes         | 0.0007           |
| Ikaria vs. Psara             | Yes         | 0.0049           |

| Groups (Geographical Origin)         | Significant | Adjusted p Value |
|--------------------------------------|-------------|------------------|
| Lemnos vs. Fournoi                   | Yes         | 0.0020           |
| Lemnos vs. Psara                     | Yes         | 0.0295           |
| Fournoi vs. Psara                    | No          | 0.9978           |
| <b>3-hydroxy-4-phenyl-2-butanone</b> |             |                  |
| Ikaria vs. Lemnos                    | No          | 0.9967           |
| Ikaria vs. Fournoi                   | Yes         | < 0.0001         |
| Ikaria vs. Psara                     | No          | 0.2563           |
| Lemnos vs. Fournoi                   | Yes         | < 0.0001         |
| Lemnos vs. Psara                     | No          | 0.0650           |
| Fournoi vs. Psara                    | Yes         | 0.0026           |

**Table S8.** Box Plot's p values comparing plant honey samples with different geographical origin. Statistically significant, p value  $\leq 0.05$ .

| Groups (Geographical Origin)         | Significant | Adjusted P Value |
|--------------------------------------|-------------|------------------|
| <b>5-HMF</b>                         |             |                  |
| Lesvos vs. Samos                     | Yes         | <0.0001          |
| Lesvos vs. Chios                     | No          | 0.1233           |
| Samos vs. Chios                      | Yes         | <0.0001          |
| <b>MSYR</b>                          |             |                  |
| Lesvos vs. Samos                     | Yes         | <0.0001          |
| Lesvos vs. Chios                     | Yes         | <0.0001          |
| Samos vs. Chios                      | No          | 0.7717           |
| <b>MG Derivative</b>                 |             |                  |
| Lesvos vs. Samos                     | Yes         | 0.0340           |
| Lesvos vs. Chios                     | No          | 0.8958           |
| Samos vs. Chios                      | Yes         | 0.0032           |
| <b>3-hydroxy-4-phenyl-2-butanone</b> |             |                  |
| Lesvos vs. Samos                     | Yes         | 0.0003           |
| Lesvos vs. Chios                     | No          | 0.2287           |
| Samos vs. Chios                      | Yes         | 0.0231           |
